# Supplementary material for: Characterization of miRNA and their target gene during chicken embryo skeletal muscle development
Source: PubMed Central journal article supplement (PMC5915118; doi:10.18632/oncotarget.22457), 2017-11-06
Supplement: oncotarget-09-17309-s001.pdf [file oncotarget-09-17309-s001.pdf]

# Characterization of miRNA and their target gene during chicken embryo skeletal muscle development

## SUPPLEMENTARY MATERIALS

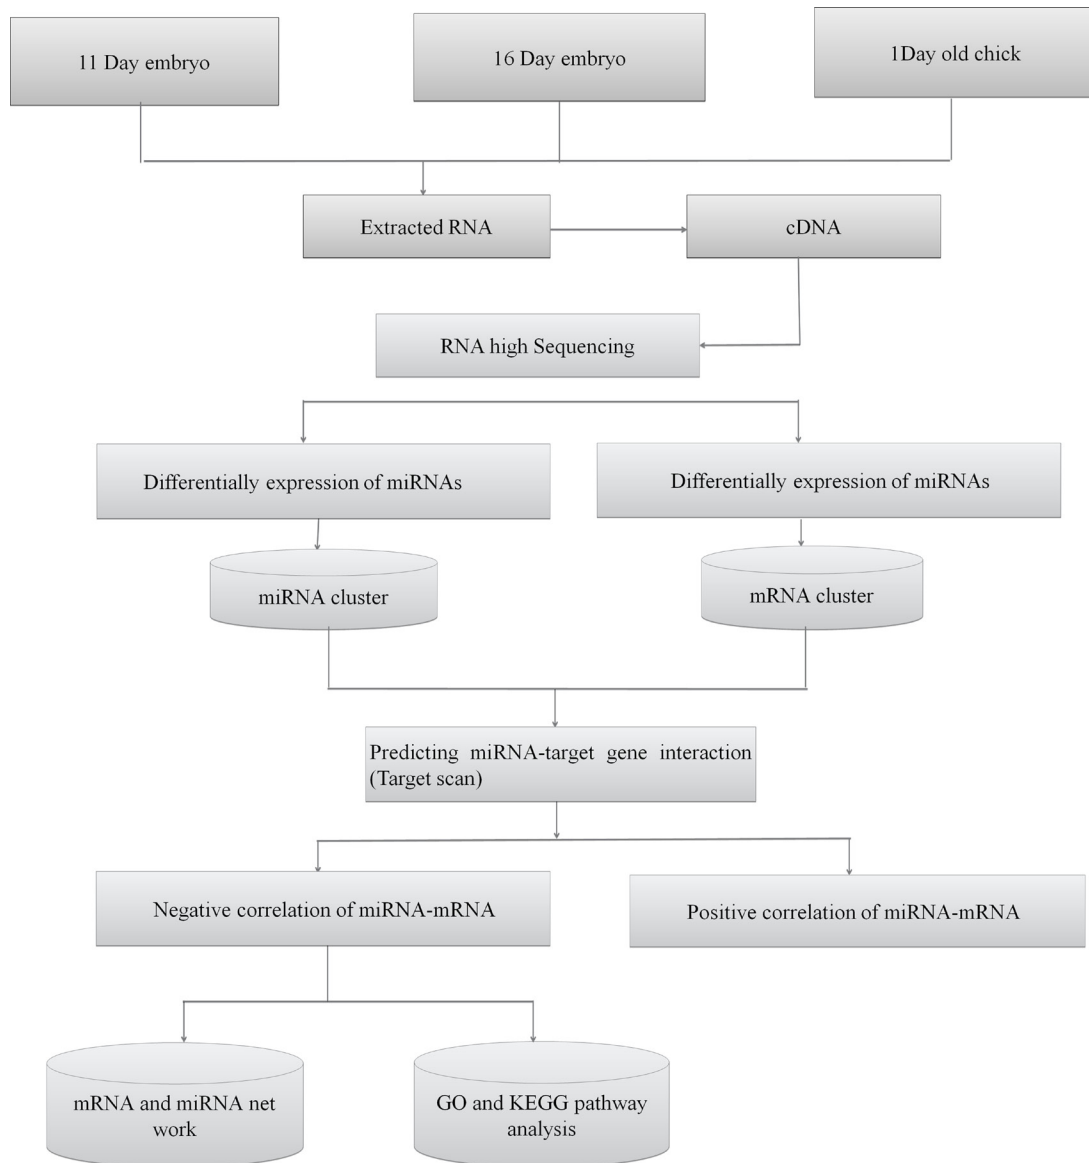

Supplementary Figure 1: General experimental work follows.

**Supplementary Table 1: The most abundant miRNA in three chicken embryonic skeletal muscles development stage using deep sequencing reading count**

| miRNAs          | E11    | E16    | P1     |
|-----------------|--------|--------|--------|
| gga-miR-499-5p  | 4076   | 47917  | 200576 |
| gga-miR-19b-3p  | 4323   | 6972   | 11312  |
| gga-let-7c-5p   | 4273   | 9160   | 17417  |
| gga-miR-128-3p  | 3954   | 9454   | 15694  |
| gga-miR-222a    | 2387.5 | 1916.5 | 2681   |
| gga-miR-10b-5p  | 79359  | 166001 | 258894 |
| gga-miR-22-3p   | 29627  | 127427 | 346533 |
| gga-miR-148a-3p | 60674  | 171817 | 324459 |
| gga-miR-181a-5p | 47158  | 116807 | 246801 |
| gga-miR-10a-5p  | 69134  | 53119  | 126970 |
| gga-let-7f-5p   | 16049  | 60235  | 103238 |
| gga-miR-126-5p  | 13034  | 76518  | 209127 |
| gga-miR-27b-3p  | 4689   | 15322  | 48240  |
| gga-miR-101-3p  | 6315   | 18858  | 47562  |
| gga-miR-100-5p  | 21441  | 24521  | 46578  |
| gga-miR-30c-5p  | 11746  | 44679  | 98333  |
| gga-miR-146c-5p | 12409  | 19031  | 33823  |
| gga-miR-133a-3p | 3562   | 95580  | 404782 |
| gga-miR-21-5p   | 3748   | 10982  | 20793  |
| gga-miR-499-5p  | 4076   | 47917  | 200576 |

E11, eleven embryo day, E16 Sixteen embryo day and P1, Post hatch one day old chick.

**Supplementary Table 2: Discovered novel miRNAs and homology with known miRNA in their seed sequences. See\_Supplementary\_Table 2**

**Supplementary Table 3: KEGG pathway analysis of differentially expressed up and down regulated gene in three contrast groups, (E11\_VS\_E16, E11\_VS\_P1, E16\_VS\_P1). See\_Supplementary\_Table 3**
